# Supplementary material for: Interleukin-3 is a predictive marker for severity and outcome during SARS-CoV-2 infections
Source: PubMed Central journal article supplement (PMC7893044; doi:10.1038/s41467-021-21310-4), 2021-02-18
Supplement: 41467_2021_21310_MOESM1_ESM.pdf [file 41467_2021_21310_MOESM1_ESM.pdf]

1 **Supplementary information Bénard et al.**

2  
3  
4  
5  
6 **Interleukin-3 is a predictive marker for severity and outcome during SARS-CoV-2**  
7 **infections**  
8

9 Alan Bénard<sup>1\*</sup>, Anne Jacobsen<sup>1</sup>, Maximilian Brunner<sup>1</sup>, Christian Krautz<sup>1</sup>, Bettina Klösch<sup>1</sup>,  
10 Izabela Swierzy<sup>1</sup>, Elisabeth Naschberger<sup>1</sup>, Malgorzata J. Podolska<sup>1</sup>, Dina Kouhestani<sup>1</sup>, Paul  
11 David<sup>1</sup>, Torsten Birkholz<sup>2</sup>, Ixchel Castellanos<sup>2</sup>, Denis Trufa<sup>3</sup>, Horia Sirbu<sup>3</sup>, Marcel Vetter<sup>4</sup>,  
12 Andreas E. Kremer<sup>4</sup>, Kai Hildner<sup>4</sup>, Andreas Hecker<sup>5</sup>, Fabian Edinger<sup>5</sup>, Matthias Tenbusch<sup>6</sup>,  
13 Petra Mühl-Zürbes<sup>7</sup>, Alexander Steinkasserer<sup>7</sup>, Enrico Richter<sup>8</sup>, Hendrik Streeck<sup>8</sup>, Marc M.  
14 Berger<sup>9</sup>, Thorsten Brenner<sup>9</sup>, Markus A. Weigand<sup>10</sup>, Filip K. Swirski<sup>11</sup>, Georg Schett<sup>12</sup>, Robert  
15 Grützmann<sup>1</sup>, and Georg F. Weber<sup>1\*</sup>

16  
17 <sup>1</sup> Department of Surgery, Friedrich-Alexander University (FAU) Erlangen-Nürnberg and  
18 Universitätsklinikum Erlangen, Erlangen, Germany

19 <sup>2</sup> Department of Anesthesiology, Friedrich-Alexander University (FAU) Erlangen-  
20 Nürnberg and Universitätsklinikum Erlangen, Erlangen, Germany

21 <sup>3</sup> Department of Thoracic Surgery, Friedrich-Alexander University (FAU) Erlangen-  
22 Nürnberg and Universitätsklinikum Erlangen, Erlangen, Germany

23 <sup>4</sup> Department of Internal Medicine 1 - Gastroenterology, Pneumology and Endocrinology,  
24 Friedrich-Alexander University (FAU) Erlangen-Nürnberg and Universitätsklinikum  
25 Erlangen, Erlangen, German

26 <sup>5</sup> Department of Surgery, University Hospital, Giessen, Germany

27 <sup>6</sup> Institute of Clinical and Molecular Virology, Friedrich-Alexander University (FAU)  
28 Erlangen-Nürnberg and Universitätsklinikum Erlangen, Erlangen, Germany

29 <sup>7</sup> Department of Immune Modulation, Friedrich-Alexander University (FAU) Erlangen-  
30 Nürnberg and Universitätsklinikum Erlangen, Erlangen, Germany

31 <sup>8</sup> Institute of Virology, University Hospital, Bonn, Germany

32 <sup>9</sup> Department of Anesthesiology and Intensive Care Medicine, University Hospital Essen,  
33 University Duisburg-Essen, Essen, Germany

34 <sup>10</sup> Department of Anesthesiology, Heidelberg University Hospital, Heidelberg, Germany

35 <sup>11</sup> Center for Systems Biology, Massachusetts General Hospital and Harvard Medical School,  
36 Boston, MA, USA

37 <sup>12</sup> Department of Internal Medicine 3 - Rheumatology and Immunology, Friedrich-Alexander  
38 University (FAU) Erlangen-Nürnberg and Universitätsklinikum Erlangen, Erlangen,  
39 Germany

40  
41 \* Corresponding authors: Georg F. Weber; Alan Bénard  
42  
43  
44  
45  
46  
47  
48  
49  
50

51 Correspondence to:  
52 Georg F. Weber  
53 Email: [georg.weber@uk-erlangen.de](mailto:georg.weber@uk-erlangen.de)  
54 Phone: +49-9131-85-42046

55  
56 Or

57  
58 Alan Bénard  
59 Email: [alan.benard@uk-erlangen.de](mailto:alan.benard@uk-erlangen.de)  
60 Phone: +49-9131-85-42055

61  
62 Department of Surgery, Universitätsklinikum Erlangen, Friedrich-Alexander University (FAU)  
63 Erlangen-Nürnberg, Erlangen, Germany  
64

65

66

67

68

69

70

71

72

73

74

75

76

77

78

79

80

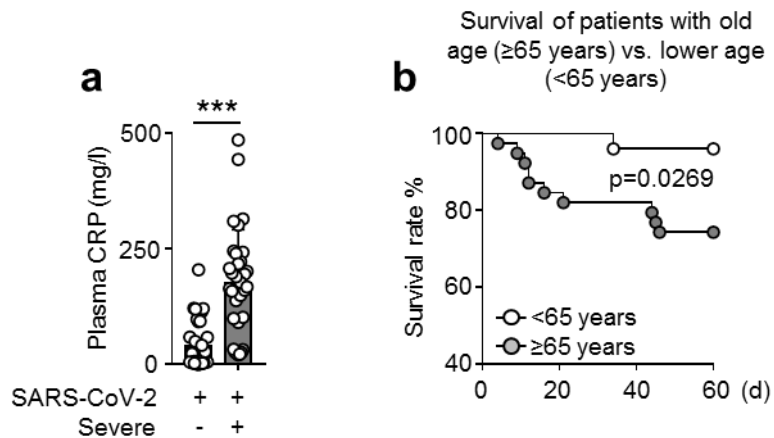

81

82

83 **Supplementary Fig. 1. Plasma CRP levels and survival of SARS-CoV-2<sup>+</sup> patients with old**  
84 **(≥65 years) vs. lower (<65 years) age. a,** Plasma CRP levels in SARS-CoV-2<sup>+</sup> patients with  
85 severe or non-severe disease. 2-tailed Mann Whitney test.  $p < 0.0001$ .  $n = 64$ . **b,** Kaplan-Meier  
86 analysis showing the survival of SARS-CoV-2<sup>+</sup> patients with old (≥65 years) or lower (<65  
87 years) age. Log-rank test.  $n = 64$ . Data are mean  $\pm$  S.E.M., \* $P < 0.05$ , \*\* $P < 0.01$ , \*\*\* $P < 0.001$ .  
88 Source data are provided as a Source Data file.

89

90

91

92

93

94

95

96  
97  
98  
99  
100  
101

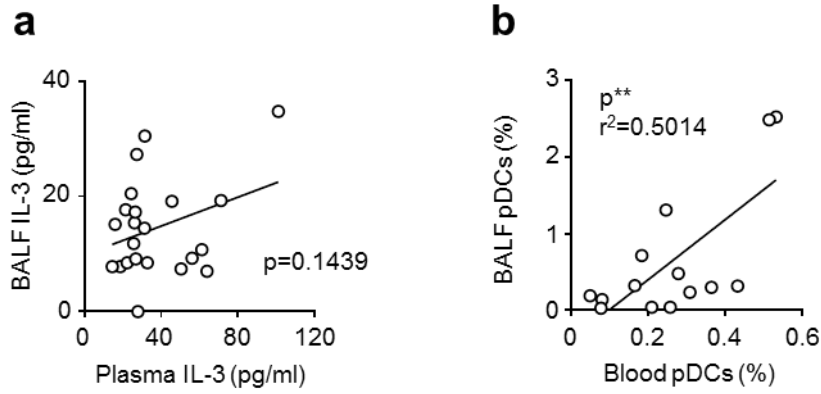

102  
103  
104  
105  
106  
107  
108  
109

**Supplementary Fig. 2. IL-3 levels and pDCs in blood and BALF of patients with pulmonary disease. a,** Correlation between plasma IL-3 levels and BALF IL-3 levels in patients with pulmonary disease. Pearson r test. n=22. **b,** Correlation between the percentage of circulating pDCs and the percentage of BALF pDCs in patients with pulmonary diseases. Pearson r test. n=14. Source data are provided as a Source Data file.

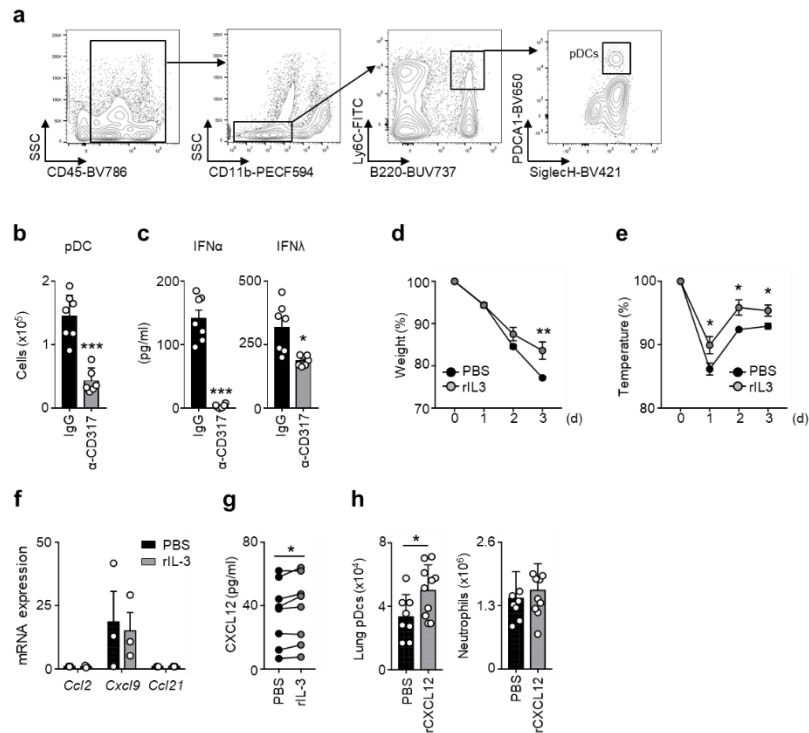

110

111 **Supplementary Fig. 3. Depletion of pDCs in mice pre-treated with IL-3 induces reduced**

112 **BALF IFN $\alpha$  and IFN $\lambda$  levels upon i.n. CpG administration. a**, Gating strategy used for

113 pDCs. **b-c**, Absolute numbers of pDCs in the lungs (**b**) and levels of IFN $\alpha$  and IFN $\lambda$  in the

114 BALF (**c**) of naive mice intravenously injected with IgG or anti-CD317 15 h before the injection

115 of rIL-3 and CpG.  $p < 0.0001$  (pDCs),  $p < 0.0001$  (IFN $\alpha$ ) and  $p = 0.0107$  (IFN $\lambda$ ).  $n = 6-7$ . **d-e**,

116 Percentage of weight loss (**d**) and body temperature (**e**) in naive WT mice after i.n. infection

117 with  $6 \times 10^6$  PFU of HSV-1. (**d**)  $p = 0.0078$  (d3); (**e**)  $p = 0.0281$  (d1),  $p = 0.014$  (d2) and  $p = 0.0186$

118 (d3).  $n = 30$ . **f**, Relative mRNA expression of *Ccl2*, *Cxcl9* and *Ccl21* in the lungs of naive mice

119 24 h after the i.n. injection of PBS or rIL-3.  $n = 3$ . **g**, Levels of CXCL12 in the supernatant of

120 lungs cells from naive mice 24 h after *ex vivo* stimulation with or without IL-3.  $p = 0.031$ .  $n = 8$ .

121 **h**, Absolute numbers of pDCs or neutrophils in the lungs of naive mice 24 h after the i.n.

122 injection of PBS or rCXCL12.  $p = 0.035$ .  $n = 8-10$  for PBS and  $n = 10$  for rCXCL12. Data are mean

123  $\pm$  S.E.M., \* $P < 0.05$ , \*\* $P < 0.01$ , \*\*\* $P < 0.001$ , paired, 2-tailed Student's t test and unpaired, 2-

124 tailed Student's t test using Welch's correction for unequal variances were used. Source data

125 are provided as a Source Data file.

126

127

128

129

130

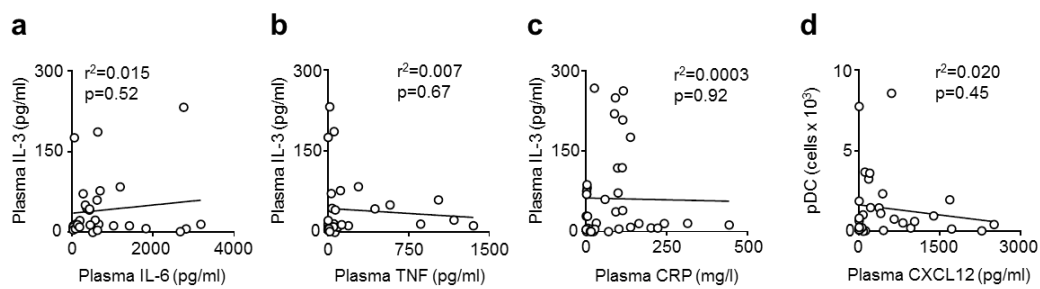

131

132 **Supplementary Fig. 4. Plasma IL-3 levels do not correlate with plasma IL-6, TNF, CRP**

133 **levels and circulating pDCs. a-c, Correlation between plasma IL-3 levels and plasma IL-6 (a),**

134 **TNF (b) and CRP (c) levels in SARS-CoV-2<sup>+</sup> patients. Pearson r test. n=31 (a-b) and n=39 (c).**

135 **d, Correlation between plasma CXCL12 levels and the amount of circulating pDCs in SARS-**

136 **CoV-2<sup>+</sup> patients. Pearson r test. n=31. Source data are provided as a Source Data file.**

137

138

139

140

141

142

143

144

145

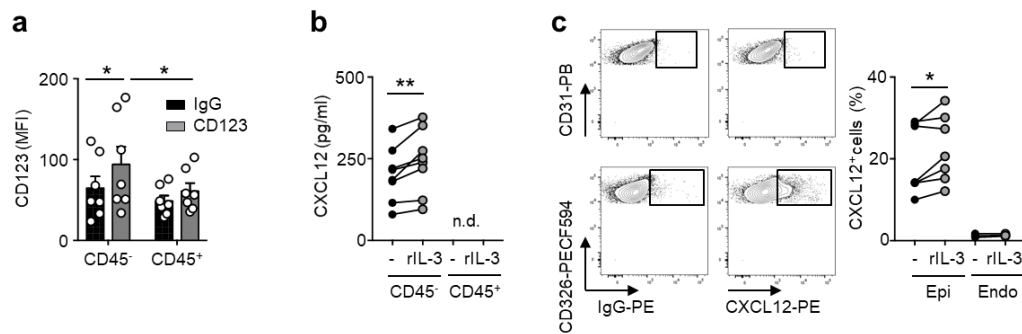

146

147 **Supplementary Fig. 5. Interleukin-3 induces CXCL12 in lung epithelial cells.** **a**, CD123  
148 expression (MFI) on the surface of CD45<sup>-</sup> and CD45<sup>+</sup> cells from the lungs of naive mice.  
149  $p=0.0138$  (CD45<sup>-</sup>) and  $p=0.0135$  (CD45<sup>+</sup>).  $n=7$ . **b**, Level of CXCL12 in the supernatant of  
150 CD45<sup>-</sup> or CD45<sup>+</sup> cells purified from the lungs of naive mice 24 h after *ex vivo* stimulation with  
151 or without rIL-3.  $n=8$ . **c**, Representative dot plot (left) and percentage (right) of CXCL12<sup>+</sup>  
152 epithelial or endothelial cells in the lungs of mice 24 h after *ex vivo* stimulation with or without  
153 rIL-3.  $p=0.0319$ .  $n=3-7$ . Data are mean  $\pm$  S.E.M., \* $P < 0.05$ , \*\* $P < 0.01$ , \*\*\* $P < 0.001$ , paired,  
154 2-tailed Student's t test and unpaired, 2-tailed Student's t test using Welch's correction for  
155 unequal variances were used. Source data are provided as a Source Data file.

156

157

158

159

160 **Supplementary Table 1: Determining the cutoff threshold of IL-3 plasma levels following**  
 161 **SARS-CoV-2 infection based on 60-days survival using the 2-tailed minimal p-value**  
 162 **approach (Logrank test; n=64). The optimal cutoff IL-3 plasma level with the lowest p-**  
 163 **value is marked grey.**

164

| <b>IL-3 plasma level (pg/ml)</b> | <b>p-value (LogRank)</b> | <b>IL-3</b> | <b>N</b>  | <b>60-days survival</b> |
|----------------------------------|--------------------------|-------------|-----------|-------------------------|
| <b>50</b>                        | 0.111                    | Low         | 53        | 79%                     |
|                                  |                          | High        | 11        | 100%                    |
| <b>30</b>                        | 0.064                    | Low         | 50        | 78%                     |
|                                  |                          | High        | 14        | 100%                    |
| <b>25</b>                        | 0.034                    | Low         | 47        | 77%                     |
|                                  |                          | High        | 17        | 100%                    |
| <b>20</b>                        | <b>0.027</b>             | <b>Low</b>  | <b>46</b> | <b>76%</b>              |
|                                  |                          | <b>High</b> | <b>18</b> | <b>100%</b>             |
| <b>15</b>                        | 0.822                    | Low         | 39        | 82%                     |
|                                  |                          | High        | 25        | 84%                     |
| <b>10</b>                        | 0.503                    | Low         | 35        | 86%                     |
|                                  |                          | High        | 29        | 79%                     |
| <b>5</b>                         | 0.397                    | Low         | 24        | 87%                     |
|                                  |                          | High        | 40        | 80%                     |

165

166



167 **Supplementary Table 2: Multivariate analysis of the impact of different risk factors on**  
 168 **mortality following SARS-CoV-2 infection (multivariate logistic regression analysis with**  
 169 **univariate Chi-squared test; n=64).**

170

|                      | Univariate   | Multivariate |               |              |
|----------------------|--------------|--------------|---------------|--------------|
|                      | p-value      | HR           | CI            | p-value      |
| Age ≥ 65 years       | <b>0.042</b> | -            | -             | 0.157        |
| Gender               | 1.000        |              |               |              |
| CRP < 140 mg/l*      | <b>0.001</b> | 0.102        | 0.019 – 0.552 | <b>0.002</b> |
| IL-3 ≥ 20 pg/ml**    | <b>0.026</b> | 0.000        | 0.000         | <b>0.026</b> |
| CXCL12 ≥ 10 pg/ml*   | 0.322        |              |               |              |
| Invasive ventilation | <b>0.045</b> | -            | -             | 0.468        |
| ECMO                 | 0.134        |              |               |              |

171

172

173 \*cutoff was determined using p-value approach; bold values are significant (p < 0.05).

174 \*\*HR (Hazard ratio) and CI (Confidence interval) are “0.000” because no patient died when  
 175 IL-3 ≥20 pg/ml.

176

177

178

179 **Supplementary Table 3: Risk to die from SARS-CoV-2 according to risk groups**

180

| <b>Risk to die</b>  | <b>Mortality</b> | <b>Mortality</b> | <b>OR</b> | <b>95%-CI</b>   |
|---------------------|------------------|------------------|-----------|-----------------|
| <b>low</b>          | 0 / 10 (0%)      |                  |           |                 |
| <b>intermediate</b> | 1 / 22 (5%)      | 1 / 32 (3%)      | -         | -               |
| <b>high</b>         | 10 / 32 (31%)    | 10 / 32 (31%)    | 14.091    | 1.680 – 118.218 |

181

182 Low (IL-3  $\geq$ 20 pg/ml and age <65 years) and intermediate (IL-3 <20 pg/ml and age <65 years  
 183 or IL-3  $\geq$ 20 pg/ml and age  $\geq$ 65 years) vs. high (IL-3 <20 pg/ml and age  $\geq$ 65 years).

184

185

186

187

188

189

190

191

192

193

194

195

196

197

198

199

200

201

202

203 **Supplementary Table 4: Baseline data of patients scheduled for elective bronchoalveolar**  
 204 **lavage.**

205

---

**Baseline data of the BAL group (n=25)**

---

**Demographic data**

|          |               |
|----------|---------------|
| Age, y   | 58.4 (± 12.4) |
| Male sex | 15 (60%)      |

**Localization of the BAL**

|                   |         |
|-------------------|---------|
| Right upper lobe  | 8 (32%) |
| Right middle lobe | 7 (28%) |
| Right lower lobe  | 4 (16%) |
| Left upper lobe   | 6 (24%) |
| Left lower lobe   | 0 (0%)  |

**Main diagnosis**

|                              |          |
|------------------------------|----------|
| Primary respiratory          | 18 (72%) |
| Non-inflammatory             | 3 (17%)  |
| NSCLC                        | 2 (67%)  |
| Unclear lung lesion          | 1 (33%)  |
| Inflammatory                 | 15 (83%) |
| Bacterial pneumonia          | 6 (40%)  |
| Undetermined pneumonia       | 1 (7%)   |
| Undetermined lymphadenopathy | 2 (13%)  |
| Undetermined lung fibrosis   | 2 (13%)  |
| Sarcoid                      | 1 (7%)   |
| COPD                         | 1 (7%)   |
| Tuberculosis                 | 1 (7%)   |
| Systemic sclerosis           | 1 (7%)   |
| Primary non-respiratory      | 6 (24%)  |
| Unknown                      | 1 (4%)   |

---

206 Data is presented as the number (%) or the mean (± standard deviation).

207

208

209 **Supplementary Table 5: Baseline data of patients scheduled for elective thoracic surgery**  
 210 **to obtain lung tissue.**

211

---

**Baseline data of the lung tissue specimens (n=17)**

---

**Demographic data**

|          |                   |
|----------|-------------------|
| Age, y   | 62.4 ( $\pm$ 7.4) |
| Male sex | 9 (53%)           |

**Localization of lung tissue**

|                   |         |
|-------------------|---------|
| Right upper lobe  | 7 (41%) |
| Right middle lobe | 0 (0%)  |
| Right lower lobe  | 4 (24%) |
| Left upper lobe   | 2 (12%) |
| Left lower lobe   | 4 (24%) |

**Main diagnosis**

|                         |          |
|-------------------------|----------|
| Primary respiratory     | 14 (82%) |
| Non-inflammatory        | 12 (86%) |
| NSCLC                   | 11 (92%) |
| Chondrohamatoma         | 1 (8%)   |
| Inflammatory            | 2 (14%)  |
| IgG4                    | 1 (50%)  |
| Granuloma               | 1 (50%)  |
| Primary non-respiratory | 3 (18%)  |

---

212 Data is presented as the number (%) or the mean ( $\pm$  standard deviation).

213

214

215

216

217

218 **Supplementary Table 6: Mouse primer**

219

| Name          | Forward                       | Reverse                         |
|---------------|-------------------------------|---------------------------------|
| <i>Hprt</i>   | 5'-GTTCTTTGCTGACCTGCTGGAT-3'  | 5'-CCCCGTTGACTGATCATTACAG-3'    |
| <i>Ccl2</i>   | 5'-CCACTCACCTGCTGCTACTCATT-3' | 5'-TTCCTTCTTGGGGTCAGCACAGAC-3'  |
| <i>Cxcl9</i>  | 5'-AGCAGTGTGGAGTTCGAGGAAC-3'  | 5'-AGGGATTTGTAGTGGATCGTGC-3'    |
| <i>Ccl21</i>  | 5'-AGAACCTGATGCGCCGC-3'       | 5'-GGCTGTGTCTGTTTCAGTTCTCTTG-3' |
| <i>Cxcl12</i> | 5'-CTGTGCCCTTCAGATTGTTG-3'    | 5'-TTTCTTCTCTGCGCCCCTT-3'       |

220

221

222

223

224

225

226

227

228

229

230

231
